# Supplementary material for: Iridium derivatives of fluorinated aromatics by C–H activation: isolation of classical and non-classical hydrides
Source: Royal Society of Chemistry journal article supplement (doi:10.1039/b807077f), 2008-01-01
Supplement: b807077f.pdf [file b807077f.pdf]

## Supportina Material

### Iridium Derivatives of Fluorinated Aromatics by C–H activation: Isolation of Classical and Non-classical Hydrides

Marcel Ahijado Salomon, Thomas Braun<sup>\*,§</sup> and Ingo Crossing<sup>‡</sup>

Coordinates are deposited in the PDB format and may be viewed e.g. with Jmol.

#### *cis-trans*-[Ir(4-C<sub>5</sub>NF<sub>4</sub>)(H)<sub>2</sub>(PiPr<sub>3</sub>)<sub>2</sub>] (2)

SCF-energy: -2143.166325084 H

Xyz-Coordinates (PDB-Format):

HEADER

REMARK test basis

|        |    |    |   |        |        |        |
|--------|----|----|---|--------|--------|--------|
| HETATM | 1  | ir | 1 | 0.257  | -0.723 | -0.001 |
| HETATM | 2  | p  | 1 | 2.614  | -0.451 | 0.018  |
| HETATM | 3  | p  | 1 | -1.956 | -1.557 | 0.000  |
| HETATM | 4  | c  | 1 | 3.180  | -0.958 | 1.766  |
| HETATM | 5  | c  | 1 | 3.479  | 1.191  | -0.360 |
| HETATM | 6  | c  | 1 | 3.511  | -1.722 | -1.090 |
| HETATM | 7  | c  | 1 | 2.261  | -0.348 | 2.841  |
| HETATM | 8  | c  | 1 | 4.659  | -0.752 | 2.131  |
| HETATM | 9  | c  | 1 | 3.083  | 2.304  | 0.627  |
| HETATM | 10 | c  | 1 | 3.229  | 1.635  | -1.813 |
| HETATM | 11 | c  | 1 | 4.999  | -1.442 | -1.378 |
| HETATM | 12 | c  | 1 | 2.761  | -2.009 | -2.403 |
| HETATM | 13 | c  | 1 | -2.593 | -1.801 | 1.781  |
| HETATM | 14 | c  | 1 | -2.206 | -3.222 | -0.870 |
| HETATM | 15 | c  | 1 | -3.237 | -0.347 | -0.720 |
| HETATM | 16 | c  | 1 | -1.444 | -2.136 | 2.749  |
| HETATM | 17 | c  | 1 | -3.767 | -2.779 | 1.983  |
| HETATM | 18 | c  | 1 | -1.484 | -4.377 | -0.151 |
| HETATM | 19 | c  | 1 | -4.725 | -0.693 | -0.538 |
| HETATM | 20 | c  | 1 | -1.754 | -3.181 | -2.341 |
| HETATM | 21 | c  | 1 | -2.956 | 0.049  | -2.182 |
| HETATM | 22 | c  | 1 | -0.375 | 1.315  | 0.006  |
| HETATM | 23 | c  | 1 | -0.434 | 2.190  | -1.092 |
| HETATM | 24 | c  | 1 | -0.879 | 3.516  | -0.963 |
| HETATM | 25 | n  | 1 | -1.289 | 4.034  | 0.183  |
| HETATM | 26 | c  | 1 | -1.268 | 3.246  | 1.246  |
| HETATM | 27 | c  | 1 | -0.824 | 1.917  | 1.196  |
| HETATM | 28 | f  | 1 | -0.846 | 1.186  | 2.354  |
| HETATM | 29 | f  | 1 | -1.699 | 3.766  | 2.410  |
| HETATM | 30 | f  | 1 | -0.053 | 1.774  | -2.336 |

|        |    |   |   |        |        |        |
|--------|----|---|---|--------|--------|--------|
| HETATM | 31 | f | 1 | -0.902 | 4.316  | -2.044 |
| HETATM | 32 | h | 1 | 0.729  | -2.329 | 0.037  |
| HETATM | 33 | h | 1 | 0.270  | -0.773 | -1.550 |
| HETATM | 34 | h | 1 | 2.971  | -2.053 | 1.742  |
| HETATM | 35 | h | 1 | 4.567  | 0.985  | -0.238 |
| HETATM | 36 | h | 1 | 3.442  | -2.642 | -0.464 |
| HETATM | 37 | h | 1 | 2.422  | -0.861 | 3.816  |
| HETATM | 38 | h | 1 | 1.184  | -0.451 | 2.583  |
| HETATM | 39 | h | 1 | 2.452  | 0.735  | 2.995  |
| HETATM | 40 | h | 1 | 4.834  | -1.094 | 3.177  |
| HETATM | 41 | h | 1 | 4.959  | 0.318  | 2.085  |
| HETATM | 42 | h | 1 | 5.348  | -1.332 | 1.482  |
| HETATM | 43 | h | 1 | 3.562  | 3.262  | 0.318  |
| HETATM | 44 | h | 1 | 3.413  | 2.093  | 1.666  |
| HETATM | 45 | h | 1 | 1.984  | 2.465  | 0.638  |
| HETATM | 46 | h | 1 | 3.757  | 2.598  | -2.003 |
| HETATM | 47 | h | 1 | 2.150  | 1.793  | -2.015 |
| HETATM | 48 | h | 1 | 3.608  | 0.901  | -2.555 |
| HETATM | 49 | h | 1 | 5.450  | -2.329 | -1.879 |
| HETATM | 50 | h | 1 | 5.598  | -1.242 | -0.466 |
| HETATM | 51 | h | 1 | 5.132  | -0.580 | -2.068 |
| HETATM | 52 | h | 1 | 3.288  | -2.814 | -2.965 |
| HETATM | 53 | h | 1 | 2.717  | -1.115 | -3.064 |
| HETATM | 54 | h | 1 | 1.722  | -2.344 | -2.208 |
| HETATM | 55 | h | 1 | -2.943 | -0.772 | 2.030  |
| HETATM | 56 | h | 1 | -3.305 | -3.407 | -0.833 |
| HETATM | 57 | h | 1 | -3.011 | 0.547  | -0.094 |
| HETATM | 58 | h | 1 | -1.821 | -2.140 | 3.797  |
| HETATM | 59 | h | 1 | -0.630 | -1.383 | 2.693  |
| HETATM | 60 | h | 1 | -0.999 | -3.132 | 2.541  |
| HETATM | 61 | h | 1 | -4.173 | -2.657 | 3.014  |
| HETATM | 62 | h | 1 | -3.443 | -3.838 | 1.889  |
| HETATM | 63 | h | 1 | -4.607 | -2.621 | 1.278  |
| HETATM | 64 | h | 1 | -1.659 | -5.325 | -0.708 |
| HETATM | 65 | h | 1 | -1.833 | -4.535 | 0.890  |
| HETATM | 66 | h | 1 | -0.388 | -4.191 | -0.121 |
| HETATM | 67 | h | 1 | -5.344 | 0.097  | -1.023 |
| HETATM | 68 | h | 1 | -5.033 | -0.732 | 0.527  |
| HETATM | 69 | h | 1 | -4.999 | -1.658 | -1.020 |
| HETATM | 70 | h | 1 | -1.931 | -4.175 | -2.812 |
| HETATM | 71 | h | 1 | -0.666 | -2.962 | -2.407 |
| HETATM | 72 | h | 1 | -2.294 | -2.424 | -2.944 |
| HETATM | 73 | h | 1 | -3.473 | 1.009  | -2.407 |
| HETATM | 74 | h | 1 | -3.354 | -0.706 | -2.896 |
| HETATM | 75 | h | 1 | -1.877 | 0.198  | -2.389 |

END

\$vibrational spectrum

| # | mode | symmetry | wave number | IR intensity | selection rules |
|---|------|----------|-------------|--------------|-----------------|
| # |      | cm**(-1) | km/mol      | IR           | RAMAN           |
| 1 |      | 0.00     | 0.00000     | -            | -               |

|    |   |        |         |     |     |
|----|---|--------|---------|-----|-----|
| 2  |   | 0.00   | 0.00000 | -   | -   |
| 3  |   | 0.00   | 0.00000 | -   | -   |
| 4  |   | 0.00   | 0.00000 | -   | -   |
| 5  |   | 0.00   | 0.00000 | -   | -   |
| 6  |   | 0.00   | 0.00000 | -   | -   |
| 7  | a | 16.03  | 0.11513 | YES | YES |
| 8  | a | 24.48  | 0.27374 | YES | YES |
| 9  | a | 28.75  | 0.33544 | YES | YES |
| 10 | a | 37.17  | 0.28258 | YES | YES |
| 11 | a | 38.76  | 0.73554 | YES | YES |
| 12 | a | 41.98  | 0.52147 | YES | YES |
| 13 | a | 53.79  | 0.30266 | YES | YES |
| 14 | a | 62.56  | 0.57132 | YES | YES |
| 15 | a | 76.87  | 0.13334 | YES | YES |
| 16 | a | 79.14  | 0.48359 | YES | YES |
| 17 | a | 86.62  | 0.07508 | YES | YES |
| 18 | a | 92.34  | 0.15920 | YES | YES |
| 19 | a | 100.14 | 1.67775 | YES | YES |
| 20 | a | 108.99 | 0.05731 | YES | YES |
| 21 | a | 113.90 | 0.01332 | YES | YES |
| 22 | a | 118.48 | 0.63063 | YES | YES |
| 23 | a | 124.57 | 1.29207 | YES | YES |
| 24 | a | 127.63 | 0.57800 | YES | YES |
| 25 | a | 137.99 | 0.58919 | YES | YES |
| 26 | a | 143.68 | 0.29218 | YES | YES |
| 27 | a | 149.76 | 0.50728 | YES | YES |
| 28 | a | 158.99 | 0.18860 | YES | YES |
| 29 | a | 167.63 | 1.07721 | YES | YES |
| 30 | a | 171.04 | 0.30606 | YES | YES |
| 31 | a | 178.83 | 0.15486 | YES | YES |
| 32 | a | 182.42 | 0.29274 | YES | YES |
| 33 | a | 190.46 | 0.82562 | YES | YES |
| 34 | a | 193.02 | 0.07232 | YES | YES |
| 35 | a | 202.93 | 0.27161 | YES | YES |
| 36 | a | 209.34 | 0.75986 | YES | YES |
| 37 | a | 211.53 | 0.22346 | YES | YES |
| 38 | a | 214.92 | 0.95050 | YES | YES |
| 39 | a | 218.35 | 0.02279 | YES | YES |
| 40 | a | 224.73 | 0.57821 | YES | YES |
| 41 | a | 227.21 | 0.59982 | YES | YES |
| 42 | a | 236.52 | 0.58209 | YES | YES |
| 43 | a | 239.21 | 0.88868 | YES | YES |
| 44 | a | 247.03 | 0.19251 | YES | YES |
| 45 | a | 248.56 | 0.45439 | YES | YES |
| 46 | a | 251.69 | 1.62404 | YES | YES |
| 47 | a | 258.60 | 0.25521 | YES | YES |
| 48 | a | 260.56 | 0.51728 | YES | YES |
| 49 | a | 261.73 | 0.60026 | YES | YES |
| 50 | a | 274.42 | 0.18104 | YES | YES |
| 51 | a | 285.78 | 0.42764 | YES | YES |
| 52 | a | 290.36 | 0.27489 | YES | YES |

|     |   |        |          |     |     |
|-----|---|--------|----------|-----|-----|
| 53  | a | 296.87 | 0.46945  | YES | YES |
| 54  | a | 302.05 | 0.33584  | YES | YES |
| 55  | a | 303.64 | 0.16747  | YES | YES |
| 56  | a | 325.87 | 1.35880  | YES | YES |
| 57  | a | 341.98 | 0.88383  | YES | YES |
| 58  | a | 347.67 | 0.98430  | YES | YES |
| 59  | a | 370.12 | 0.16734  | YES | YES |
| 60  | a | 373.08 | 0.29062  | YES | YES |
| 61  | a | 381.40 | 2.81110  | YES | YES |
| 62  | a | 390.80 | 2.05078  | YES | YES |
| 63  | a | 401.00 | 2.18115  | YES | YES |
| 64  | a | 425.32 | 5.53090  | YES | YES |
| 65  | a | 429.20 | 5.17101  | YES | YES |
| 66  | a | 447.61 | 0.95899  | YES | YES |
| 67  | a | 453.05 | 28.43124 | YES | YES |
| 68  | a | 458.06 | 9.04870  | YES | YES |
| 69  | a | 460.92 | 4.68829  | YES | YES |
| 70  | a | 461.08 | 0.48354  | YES | YES |
| 71  | a | 464.12 | 6.61847  | YES | YES |
| 72  | a | 469.50 | 8.48442  | YES | YES |
| 73  | a | 497.53 | 0.63167  | YES | YES |
| 74  | a | 549.55 | 10.06457 | YES | YES |
| 75  | a | 569.71 | 38.22407 | YES | YES |
| 76  | a | 580.99 | 66.67077 | YES | YES |
| 77  | a | 593.16 | 20.48554 | YES | YES |
| 78  | a | 596.52 | 16.68214 | YES | YES |
| 79  | a | 622.79 | 12.93763 | YES | YES |
| 80  | a | 638.19 | 13.53272 | YES | YES |
| 81  | a | 644.36 | 56.52327 | YES | YES |
| 82  | a | 646.32 | 12.17858 | YES | YES |
| 83  | a | 650.69 | 2.07760  | YES | YES |
| 84  | a | 664.97 | 10.03884 | YES | YES |
| 85  | a | 669.50 | 0.71125  | YES | YES |
| 86  | a | 704.38 | 2.45831  | YES | YES |
| 87  | a | 744.02 | 13.49354 | YES | YES |
| 88  | a | 790.85 | 40.01697 | YES | YES |
| 89  | a | 871.60 | 3.54726  | YES | YES |
| 90  | a | 875.16 | 6.98254  | YES | YES |
| 91  | a | 879.95 | 5.40662  | YES | YES |
| 92  | a | 881.24 | 4.44628  | YES | YES |
| 93  | a | 882.21 | 7.54999  | YES | YES |
| 94  | a | 883.56 | 7.95404  | YES | YES |
| 95  | a | 899.75 | 1.37849  | YES | YES |
| 96  | a | 900.27 | 9.71289  | YES | YES |
| 97  | a | 903.24 | 2.24438  | YES | YES |
| 98  | a | 907.65 | 5.31212  | YES | YES |
| 99  | a | 910.14 | 17.79253 | YES | YES |
| 100 | a | 913.41 | 58.67371 | YES | YES |
| 101 | a | 914.85 | 57.36784 | YES | YES |
| 102 | a | 942.10 | 1.62042  | YES | YES |
| 103 | a | 943.55 | 0.66978  | YES | YES |

|     |   |         |           |     |     |
|-----|---|---------|-----------|-----|-----|
| 104 | a | 945.33  | 1.69401   | YES | YES |
| 105 | a | 949.76  | 0.16421   | YES | YES |
| 106 | a | 951.52  | 2.02815   | YES | YES |
| 107 | a | 952.83  | 0.02655   | YES | YES |
| 108 | a | 1007.61 | 9.81200   | YES | YES |
| 109 | a | 1011.03 | 13.25191  | YES | YES |
| 110 | a | 1016.87 | 8.90839   | YES | YES |
| 111 | a | 1019.43 | 8.80868   | YES | YES |
| 112 | a | 1044.30 | 37.78748  | YES | YES |
| 113 | a | 1047.39 | 7.05423   | YES | YES |
| 114 | a | 1080.81 | 2.04274   | YES | YES |
| 115 | a | 1083.61 | 0.88060   | YES | YES |
| 116 | a | 1088.31 | 2.42246   | YES | YES |
| 117 | a | 1099.21 | 4.49772   | YES | YES |
| 118 | a | 1100.78 | 10.19609  | YES | YES |
| 119 | a | 1102.43 | 2.73517   | YES | YES |
| 120 | a | 1109.43 | 3.90577   | YES | YES |
| 121 | a | 1141.47 | 0.69951   | YES | YES |
| 122 | a | 1145.40 | 2.53826   | YES | YES |
| 123 | a | 1147.97 | 5.41431   | YES | YES |
| 124 | a | 1148.75 | 4.19267   | YES | YES |
| 125 | a | 1149.14 | 2.30454   | YES | YES |
| 126 | a | 1151.78 | 3.25825   | YES | YES |
| 127 | a | 1174.07 | 160.61478 | YES | YES |
| 128 | a | 1220.16 | 31.33268  | YES | YES |
| 129 | a | 1225.26 | 19.84246  | YES | YES |
| 130 | a | 1228.86 | 7.28290   | YES | YES |
| 131 | a | 1241.05 | 6.22607   | YES | YES |
| 132 | a | 1251.85 | 4.37553   | YES | YES |
| 133 | a | 1257.90 | 5.75605   | YES | YES |
| 134 | a | 1273.62 | 0.33512   | YES | YES |
| 135 | a | 1278.44 | 0.58591   | YES | YES |
| 136 | a | 1278.77 | 1.71365   | YES | YES |
| 137 | a | 1284.95 | 2.31748   | YES | YES |
| 138 | a | 1290.08 | 0.60670   | YES | YES |
| 139 | a | 1292.44 | 1.12986   | YES | YES |
| 140 | a | 1324.79 | 15.18487  | YES | YES |
| 141 | a | 1344.60 | 3.04827   | YES | YES |
| 142 | a | 1348.21 | 1.63356   | YES | YES |
| 143 | a | 1349.66 | 0.60448   | YES | YES |
| 144 | a | 1351.81 | 1.93852   | YES | YES |
| 145 | a | 1357.40 | 1.96259   | YES | YES |
| 146 | a | 1357.81 | 1.10828   | YES | YES |
| 147 | a | 1364.15 | 6.44520   | YES | YES |
| 148 | a | 1367.09 | 45.26913  | YES | YES |
| 149 | a | 1368.44 | 12.53180  | YES | YES |
| 150 | a | 1369.00 | 9.49674   | YES | YES |
| 151 | a | 1371.57 | 9.08997   | YES | YES |
| 152 | a | 1376.29 | 4.10120   | YES | YES |
| 153 | a | 1378.19 | 4.65087   | YES | YES |
| 154 | a | 1412.32 | 34.74122  | YES | YES |

|     |   |         |           |     |     |
|-----|---|---------|-----------|-----|-----|
| 155 | a | 1414.90 | 35.59753  | YES | YES |
| 156 | a | 1417.85 | 35.60123  | YES | YES |
| 157 | a | 1420.71 | 70.46093  | YES | YES |
| 158 | a | 1421.19 | 13.86525  | YES | YES |
| 159 | a | 1422.50 | 8.00754   | YES | YES |
| 160 | a | 1424.29 | 136.96286 | YES | YES |
| 161 | a | 1426.94 | 1.77868   | YES | YES |
| 162 | a | 1429.86 | 61.12355  | YES | YES |
| 163 | a | 1430.26 | 32.56044  | YES | YES |
| 164 | a | 1431.10 | 1.89125   | YES | YES |
| 165 | a | 1431.90 | 8.58777   | YES | YES |
| 166 | a | 1435.14 | 2.66218   | YES | YES |
| 167 | a | 1437.17 | 12.99561  | YES | YES |
| 168 | a | 1438.04 | 10.03159  | YES | YES |
| 169 | a | 1440.60 | 4.33529   | YES | YES |
| 170 | a | 1441.68 | 4.52767   | YES | YES |
| 171 | a | 1442.59 | 16.98349  | YES | YES |
| 172 | a | 1445.45 | 3.56558   | YES | YES |
| 173 | a | 1447.56 | 18.15982  | YES | YES |
| 174 | a | 1450.77 | 0.24828   | YES | YES |
| 175 | a | 1451.60 | 6.45756   | YES | YES |
| 176 | a | 1453.24 | 2.20277   | YES | YES |
| 177 | a | 1454.58 | 17.41708  | YES | YES |
| 178 | a | 1459.01 | 11.64847  | YES | YES |
| 179 | a | 1459.81 | 1.31575   | YES | YES |
| 180 | a | 1570.07 | 53.54660  | YES | YES |
| 181 | a | 1595.59 | 181.77618 | YES | YES |
| 182 | a | 1939.73 | 273.71321 | YES | YES |
| 183 | a | 2409.95 | 1.58377   | YES | YES |
| 184 | a | 2938.05 | 29.10476  | YES | YES |
| 185 | a | 2940.63 | 19.75930  | YES | YES |
| 186 | a | 2941.74 | 4.67639   | YES | YES |
| 187 | a | 2942.30 | 31.07481  | YES | YES |
| 188 | a | 2942.87 | 18.73462  | YES | YES |
| 189 | a | 2942.98 | 1.21571   | YES | YES |
| 190 | a | 2944.46 | 8.09747   | YES | YES |
| 191 | a | 2944.95 | 45.93063  | YES | YES |
| 192 | a | 2946.21 | 3.55842   | YES | YES |
| 193 | a | 2946.95 | 16.90254  | YES | YES |
| 194 | a | 2947.23 | 44.80992  | YES | YES |
| 195 | a | 2947.34 | 33.76815  | YES | YES |
| 196 | a | 2947.79 | 10.57036  | YES | YES |
| 197 | a | 2948.03 | 44.61191  | YES | YES |
| 198 | a | 2949.05 | 2.42751   | YES | YES |
| 199 | a | 2949.54 | 56.96600  | YES | YES |
| 200 | a | 2950.59 | 4.10982   | YES | YES |
| 201 | a | 2951.17 | 45.10095  | YES | YES |
| 202 | a | 3008.21 | 13.78554  | YES | YES |
| 203 | a | 3015.41 | 12.89620  | YES | YES |
| 204 | a | 3018.47 | 21.74726  | YES | YES |
| 205 | a | 3018.61 | 40.13303  | YES | YES |

|     |   |         |          |     |     |
|-----|---|---------|----------|-----|-----|
| 206 | a | 3019.60 | 3.06253  | YES | YES |
| 207 | a | 3021.89 | 6.67628  | YES | YES |
| 208 | a | 3022.15 | 44.89679 | YES | YES |
| 209 | a | 3024.27 | 22.68552 | YES | YES |
| 210 | a | 3024.70 | 20.66340 | YES | YES |
| 211 | a | 3025.30 | 11.57524 | YES | YES |
| 212 | a | 3027.30 | 22.88318 | YES | YES |
| 213 | a | 3031.75 | 8.34470  | YES | YES |
| 214 | a | 3045.50 | 15.29617 | YES | YES |
| 215 | a | 3048.47 | 14.93758 | YES | YES |
| 216 | a | 3049.51 | 19.16125 | YES | YES |
| 217 | a | 3051.35 | 7.63738  | YES | YES |
| 218 | a | 3054.96 | 9.37539  | YES | YES |
| 219 | a | 3056.24 | 8.74134  | YES | YES |
| 220 | a | 3056.64 | 18.48916 | YES | YES |
| 221 | a | 3057.69 | 10.89964 | YES | YES |
| 222 | a | 3065.67 | 2.57702  | YES | YES |
| 223 | a | 3071.35 | 8.16059  | YES | YES |
| 224 | a | 3071.85 | 1.99649  | YES | YES |
| 225 | a | 3074.63 | 9.06605  | YES | YES |

***cis-trans*-[Ir(4-C<sub>5</sub>NF<sub>4</sub>)(H)<sub>2</sub>(H<sub>2</sub>)(PiPr<sub>3</sub>)<sub>2</sub>] (3)**

SCF-energy: -2144.358292760 H

HEADER

REMARK test basis

|        |    |    |   |        |        |        |
|--------|----|----|---|--------|--------|--------|
| HETATM | 1  | ir | 1 | -0.630 | -0.065 | -0.124 |
| HETATM | 2  | p  | 1 | -1.182 | 2.235  | 0.075  |
| HETATM | 3  | p  | 1 | -0.548 | -2.442 | -0.053 |
| HETATM | 4  | c  | 1 | 0.178  | 3.398  | 0.727  |
| HETATM | 5  | c  | 1 | -2.627 | 2.615  | 1.255  |
| HETATM | 6  | c  | 1 | -1.661 | 3.078  | -1.565 |
| HETATM | 7  | c  | 1 | 0.679  | 3.021  | 2.133  |
| HETATM | 8  | c  | 1 | -0.161 | 4.901  | 0.686  |
| HETATM | 9  | c  | 1 | -2.555 | 1.771  | 2.542  |
| HETATM | 10 | c  | 1 | -4.032 | 2.493  | 0.641  |
| HETATM | 11 | c  | 1 | -0.427 | 3.411  | -2.427 |
| HETATM | 12 | c  | 1 | -2.660 | 2.264  | -2.413 |
| HETATM | 13 | c  | 1 | -1.548 | -3.301 | -1.432 |
| HETATM | 14 | c  | 1 | -1.154 | -3.203 | 1.567  |
| HETATM | 15 | c  | 1 | 1.216  | -3.138 | -0.253 |
| HETATM | 16 | c  | 1 | -2.895 | -2.633 | -1.765 |
| HETATM | 17 | c  | 1 | -1.740 | -4.818 | -1.240 |
| HETATM | 18 | c  | 1 | -2.641 | -2.921 | 1.840  |
| HETATM | 19 | c  | 1 | 1.716  | -2.965 | -1.699 |
| HETATM | 20 | c  | 1 | -0.298 | -2.758 | 2.767  |
| HETATM | 21 | c  | 1 | 1.521  | -4.555 | 0.269  |
| HETATM | 22 | c  | 1 | 1.512  | 0.226  | -0.043 |
| HETATM | 23 | c  | 1 | 2.286  | 0.123  | 1.131  |
| HETATM | 24 | c  | 1 | 3.672  | 0.359  | 1.140  |

|        |    |   |   |        |        |        |
|--------|----|---|---|--------|--------|--------|
| HETATM | 25 | n | 1 | 4.362  | 0.675  | 0.058  |
| HETATM | 26 | c | 1 | 3.689  | 0.767  | -1.075 |
| HETATM | 27 | c | 1 | 2.304  | 0.553  | -1.162 |
| HETATM | 28 | f | 1 | 1.746  | 0.660  | -2.408 |
| HETATM | 29 | f | 1 | 4.385  | 1.083  | -2.181 |
| HETATM | 30 | f | 1 | 1.717  | -0.199 | 2.326  |
| HETATM | 31 | f | 1 | 4.351  | 0.261  | 2.297  |
| HETATM | 32 | h | 1 | -0.258 | 0.005  | -1.913 |
| HETATM | 33 | h | 1 | -0.603 | -0.089 | 1.473  |
| HETATM | 34 | h | 1 | 1.007  | 3.196  | 0.011  |
| HETATM | 35 | h | 1 | -2.470 | 3.685  | 1.526  |
| HETATM | 36 | h | 1 | -2.156 | 4.030  | -1.259 |
| HETATM | 37 | h | 1 | -0.029 | 3.362  | 2.920  |
| HETATM | 38 | h | 1 | 1.650  | 3.532  | 2.329  |
| HETATM | 39 | h | 1 | 0.840  | 1.933  | 2.257  |
| HETATM | 40 | h | 1 | 0.739  | 5.488  | 0.982  |
| HETATM | 41 | h | 1 | -0.964 | 5.162  | 1.410  |
| HETATM | 42 | h | 1 | -0.474 | 5.266  | -0.315 |
| HETATM | 43 | h | 1 | -2.798 | 0.710  | 2.324  |
| HETATM | 44 | h | 1 | -3.298 | 2.155  | 3.278  |
| HETATM | 45 | h | 1 | -1.557 | 1.790  | 3.024  |
| HETATM | 46 | h | 1 | -4.791 | 2.723  | 1.423  |
| HETATM | 47 | h | 1 | -4.229 | 1.458  | 0.283  |
| HETATM | 48 | h | 1 | -4.203 | 3.200  | -0.198 |
| HETATM | 49 | h | 1 | 0.243  | 4.167  | -1.967 |
| HETATM | 50 | h | 1 | -0.762 | 3.823  | -3.406 |
| HETATM | 51 | h | 1 | -3.502 | 1.840  | -1.832 |
| HETATM | 52 | h | 1 | -2.151 | 1.420  | -2.923 |
| HETATM | 53 | h | 1 | -3.086 | 2.918  | -3.208 |
| HETATM | 54 | h | 1 | -0.884 | -3.146 | -2.312 |
| HETATM | 55 | h | 1 | -1.023 | -4.300 | 1.428  |
| HETATM | 56 | h | 1 | 1.786  | -2.420 | 0.377  |
| HETATM | 57 | h | 1 | -3.635 | -2.749 | -0.945 |
| HETATM | 58 | h | 1 | -3.326 | -3.113 | -2.674 |
| HETATM | 59 | h | 1 | -2.791 | -1.548 | -1.962 |
| HETATM | 60 | h | 1 | -2.224 | -5.250 | -2.146 |
| HETATM | 61 | h | 1 | -2.405 | -5.046 | -0.378 |
| HETATM | 62 | h | 1 | -0.785 | -5.361 | -1.088 |
| HETATM | 63 | h | 1 | -2.835 | -1.827 | 1.885  |
| HETATM | 64 | h | 1 | -2.929 | -3.363 | 2.821  |
| HETATM | 65 | h | 1 | -3.310 | -3.358 | 1.070  |
| HETATM | 66 | h | 1 | 1.492  | -1.956 | -2.106 |
| HETATM | 67 | h | 1 | 1.276  | -3.726 | -2.382 |
| HETATM | 68 | h | 1 | 2.821  | -3.097 | -1.733 |
| HETATM | 69 | h | 1 | -0.594 | -3.341 | 3.669  |
| HETATM | 70 | h | 1 | -0.454 | -1.681 | 2.986  |
| HETATM | 71 | h | 1 | 0.791  | -2.904 | 2.612  |
| HETATM | 72 | h | 1 | 1.045  | -5.348 | -0.346 |
| HETATM | 73 | h | 1 | 1.216  | -4.708 | 1.325  |
| HETATM | 74 | h | 1 | 2.620  | -4.727 | 0.220  |
| HETATM | 75 | h | 1 | 0.181  | 2.504  | -2.636 |



HETATM 76 h 1 -1.126 -0.116 -1.863  
HETATM 77 h 1 -2.272 -0.276 0.041  
END

\$vibrational spectrum

| #  | mode | symmetry | wave number<br>cm**(-1) | IR intensity<br>km/mol | IR  | selection rules<br>RAMAN |
|----|------|----------|-------------------------|------------------------|-----|--------------------------|
| 1  |      |          | 0.00                    | 0.00000                | -   | -                        |
| 2  |      |          | 0.00                    | 0.00000                | -   | -                        |
| 3  |      |          | 0.00                    | 0.00000                | -   | -                        |
| 4  |      |          | 0.00                    | 0.00000                | -   | -                        |
| 5  |      |          | 0.00                    | 0.00000                | -   | -                        |
| 6  |      |          | 0.00                    | 0.00000                | -   | -                        |
| 7  | a    |          | 14.62                   | 0.26336                | YES | YES                      |
| 8  | a    |          | 16.56                   | 0.02491                | YES | YES                      |
| 9  | a    |          | 28.59                   | 0.19147                | YES | YES                      |
| 10 | a    |          | 34.36                   | 0.34110                | YES | YES                      |
| 11 | a    |          | 41.97                   | 0.21947                | YES | YES                      |
| 12 | a    |          | 47.80                   | 0.94113                | YES | YES                      |
| 13 | a    |          | 56.25                   | 0.44758                | YES | YES                      |
| 14 | a    |          | 63.12                   | 1.03129                | YES | YES                      |
| 15 | a    |          | 86.84                   | 0.08468                | YES | YES                      |
| 16 | a    |          | 94.01                   | 0.19383                | YES | YES                      |
| 17 | a    |          | 102.24                  | 0.30968                | YES | YES                      |
| 18 | a    |          | 110.20                  | 0.31770                | YES | YES                      |
| 19 | a    |          | 113.84                  | 0.44902                | YES | YES                      |
| 20 | a    |          | 118.03                  | 0.33944                | YES | YES                      |
| 21 | a    |          | 122.02                  | 0.45220                | YES | YES                      |
| 22 | a    |          | 124.61                  | 0.31434                | YES | YES                      |
| 23 | a    |          | 126.95                  | 1.02966                | YES | YES                      |
| 24 | a    |          | 134.97                  | 0.39687                | YES | YES                      |
| 25 | a    |          | 140.57                  | 0.73633                | YES | YES                      |
| 26 | a    |          | 148.27                  | 0.14950                | YES | YES                      |
| 27 | a    |          | 152.89                  | 0.68520                | YES | YES                      |
| 28 | a    |          | 161.71                  | 0.73338                | YES | YES                      |
| 29 | a    |          | 170.20                  | 0.52969                | YES | YES                      |
| 30 | a    |          | 173.13                  | 0.23680                | YES | YES                      |
| 31 | a    |          | 179.44                  | 0.14318                | YES | YES                      |
| 32 | a    |          | 184.68                  | 0.16728                | YES | YES                      |
| 33 | a    |          | 188.09                  | 0.99279                | YES | YES                      |
| 34 | a    |          | 198.48                  | 0.72081                | YES | YES                      |
| 35 | a    |          | 203.91                  | 1.24134                | YES | YES                      |
| 36 | a    |          | 213.02                  | 1.06715                | YES | YES                      |
| 37 | a    |          | 215.63                  | 0.95028                | YES | YES                      |
| 38 | a    |          | 218.41                  | 0.17519                | YES | YES                      |
| 39 | a    |          | 224.20                  | 0.17731                | YES | YES                      |
| 40 | a    |          | 227.67                  | 0.10876                | YES | YES                      |
| 41 | a    |          | 238.65                  | 0.37178                | YES | YES                      |
| 42 | a    |          | 242.32                  | 0.32935                | YES | YES                      |
| 43 | a    |          | 247.99                  | 0.43330                | YES | YES                      |
| 44 | a    |          | 258.33                  | 1.47855                | YES | YES                      |

|    |   |        |           |     |     |
|----|---|--------|-----------|-----|-----|
| 45 | a | 262.63 | 0.26459   | YES | YES |
| 46 | a | 265.54 | 2.85611   | YES | YES |
| 47 | a | 275.96 | 0.03730   | YES | YES |
| 48 | a | 281.61 | 0.93330   | YES | YES |
| 49 | a | 284.37 | 0.05897   | YES | YES |
| 50 | a | 293.69 | 0.48399   | YES | YES |
| 51 | a | 294.61 | 0.70796   | YES | YES |
| 52 | a | 296.24 | 0.21363   | YES | YES |
| 53 | a | 302.65 | 1.04403   | YES | YES |
| 54 | a | 310.61 | 0.20696   | YES | YES |
| 55 | a | 315.59 | 0.56436   | YES | YES |
| 56 | a | 326.86 | 4.93767   | YES | YES |
| 57 | a | 334.12 | 0.07555   | YES | YES |
| 58 | a | 354.38 | 3.64207   | YES | YES |
| 59 | a | 361.17 | 1.54657   | YES | YES |
| 60 | a | 367.89 | 1.23587   | YES | YES |
| 61 | a | 378.34 | 1.02185   | YES | YES |
| 62 | a | 383.06 | 1.59587   | YES | YES |
| 63 | a | 389.28 | 4.17142   | YES | YES |
| 64 | a | 403.84 | 4.51073   | YES | YES |
| 65 | a | 416.28 | 0.50544   | YES | YES |
| 66 | a | 429.87 | 5.51378   | YES | YES |
| 67 | a | 431.55 | 1.88009   | YES | YES |
| 68 | a | 437.74 | 8.88284   | YES | YES |
| 69 | a | 452.96 | 7.83174   | YES | YES |
| 70 | a | 456.17 | 2.53003   | YES | YES |
| 71 | a | 458.84 | 1.18574   | YES | YES |
| 72 | a | 465.10 | 34.48972  | YES | YES |
| 73 | a | 468.30 | 10.39976  | YES | YES |
| 74 | a | 495.44 | 1.68646   | YES | YES |
| 75 | a | 497.36 | 8.97760   | YES | YES |
| 76 | a | 559.14 | 32.09888  | YES | YES |
| 77 | a | 571.15 | 53.80344  | YES | YES |
| 78 | a | 594.26 | 11.33066  | YES | YES |
| 79 | a | 609.86 | 31.87387  | YES | YES |
| 80 | a | 617.94 | 27.32640  | YES | YES |
| 81 | a | 628.90 | 55.25550  | YES | YES |
| 82 | a | 641.42 | 23.83839  | YES | YES |
| 83 | a | 652.86 | 0.08625   | YES | YES |
| 84 | a | 665.08 | 11.46516  | YES | YES |
| 85 | a | 669.25 | 0.58058   | YES | YES |
| 86 | a | 684.71 | 10.10373  | YES | YES |
| 87 | a | 729.41 | 57.56890  | YES | YES |
| 88 | a | 767.00 | 16.56191  | YES | YES |
| 89 | a | 786.62 | 21.93135  | YES | YES |
| 90 | a | 849.63 | 20.40812  | YES | YES |
| 91 | a | 864.17 | 141.48859 | YES | YES |
| 92 | a | 876.90 | 5.57394   | YES | YES |
| 93 | a | 878.16 | 6.75481   | YES | YES |
| 94 | a | 879.11 | 5.44556   | YES | YES |
| 95 | a | 881.83 | 3.84668   | YES | YES |

|     |   |         |           |     |     |
|-----|---|---------|-----------|-----|-----|
| 96  | a | 882.30  | 4.44599   | YES | YES |
| 97  | a | 886.49  | 5.34258   | YES | YES |
| 98  | a | 902.24  | 3.31692   | YES | YES |
| 99  | a | 903.28  | 1.87238   | YES | YES |
| 100 | a | 906.58  | 3.41014   | YES | YES |
| 101 | a | 907.62  | 6.48362   | YES | YES |
| 102 | a | 910.27  | 7.92049   | YES | YES |
| 103 | a | 911.94  | 3.81913   | YES | YES |
| 104 | a | 914.62  | 122.88230 | YES | YES |
| 105 | a | 943.23  | 0.20729   | YES | YES |
| 106 | a | 945.21  | 2.11624   | YES | YES |
| 107 | a | 945.58  | 0.82398   | YES | YES |
| 108 | a | 949.78  | 0.74031   | YES | YES |
| 109 | a | 951.02  | 0.07828   | YES | YES |
| 110 | a | 952.25  | 0.14011   | YES | YES |
| 111 | a | 973.22  | 17.87475  | YES | YES |
| 112 | a | 1010.75 | 8.86987   | YES | YES |
| 113 | a | 1013.23 | 9.78687   | YES | YES |
| 114 | a | 1025.70 | 32.89393  | YES | YES |
| 115 | a | 1028.75 | 0.72241   | YES | YES |
| 116 | a | 1040.34 | 7.96463   | YES | YES |
| 117 | a | 1042.29 | 20.83727  | YES | YES |
| 118 | a | 1069.49 | 4.76216   | YES | YES |
| 119 | a | 1082.15 | 3.62634   | YES | YES |
| 120 | a | 1088.74 | 7.05287   | YES | YES |
| 121 | a | 1092.36 | 10.06258  | YES | YES |
| 122 | a | 1098.63 | 0.75416   | YES | YES |
| 123 | a | 1104.10 | 2.22789   | YES | YES |
| 124 | a | 1109.20 | 4.60821   | YES | YES |
| 125 | a | 1144.19 | 5.49076   | YES | YES |
| 126 | a | 1145.37 | 2.75372   | YES | YES |
| 127 | a | 1147.31 | 5.12082   | YES | YES |
| 128 | a | 1149.44 | 3.27525   | YES | YES |
| 129 | a | 1150.54 | 3.20866   | YES | YES |
| 130 | a | 1153.33 | 3.87641   | YES | YES |
| 131 | a | 1176.40 | 150.37954 | YES | YES |
| 132 | a | 1226.54 | 6.85806   | YES | YES |
| 133 | a | 1236.01 | 38.71675  | YES | YES |
| 134 | a | 1241.11 | 28.74478  | YES | YES |
| 135 | a | 1244.61 | 4.75398   | YES | YES |
| 136 | a | 1249.39 | 4.12746   | YES | YES |
| 137 | a | 1251.07 | 8.23685   | YES | YES |
| 138 | a | 1279.82 | 0.75008   | YES | YES |
| 139 | a | 1285.11 | 0.94369   | YES | YES |
| 140 | a | 1287.89 | 2.94856   | YES | YES |
| 141 | a | 1289.58 | 3.99473   | YES | YES |
| 142 | a | 1295.67 | 1.31969   | YES | YES |
| 143 | a | 1296.15 | 2.60161   | YES | YES |
| 144 | a | 1326.17 | 14.89053  | YES | YES |
| 145 | a | 1344.62 | 1.41982   | YES | YES |
| 146 | a | 1347.90 | 0.54572   | YES | YES |

|     |   |         |           |     |     |
|-----|---|---------|-----------|-----|-----|
| 147 | a | 1348.99 | 0.89041   | YES | YES |
| 148 | a | 1353.46 | 9.89093   | YES | YES |
| 149 | a | 1354.15 | 1.06252   | YES | YES |
| 150 | a | 1357.21 | 3.54498   | YES | YES |
| 151 | a | 1358.44 | 20.31075  | YES | YES |
| 152 | a | 1363.98 | 7.17574   | YES | YES |
| 153 | a | 1367.84 | 7.95977   | YES | YES |
| 154 | a | 1370.58 | 15.14709  | YES | YES |
| 155 | a | 1371.41 | 11.08159  | YES | YES |
| 156 | a | 1374.76 | 2.24003   | YES | YES |
| 157 | a | 1375.70 | 2.87464   | YES | YES |
| 158 | a | 1416.08 | 180.52829 | YES | YES |
| 159 | a | 1418.13 | 107.92600 | YES | YES |
| 160 | a | 1420.94 | 1.30462   | YES | YES |
| 161 | a | 1420.98 | 30.54574  | YES | YES |
| 162 | a | 1423.27 | 58.02585  | YES | YES |
| 163 | a | 1424.13 | 3.78906   | YES | YES |
| 164 | a | 1425.97 | 31.30143  | YES | YES |
| 165 | a | 1427.91 | 1.38071   | YES | YES |
| 166 | a | 1428.15 | 11.70204  | YES | YES |
| 167 | a | 1430.18 | 6.29322   | YES | YES |
| 168 | a | 1430.36 | 19.78295  | YES | YES |
| 169 | a | 1432.54 | 13.16416  | YES | YES |
| 170 | a | 1433.34 | 6.78631   | YES | YES |
| 171 | a | 1435.37 | 7.25747   | YES | YES |
| 172 | a | 1438.30 | 7.58768   | YES | YES |
| 173 | a | 1442.29 | 6.21245   | YES | YES |
| 174 | a | 1443.95 | 8.12229   | YES | YES |
| 175 | a | 1444.79 | 7.34358   | YES | YES |
| 176 | a | 1445.06 | 1.11651   | YES | YES |
| 177 | a | 1447.60 | 7.46400   | YES | YES |
| 178 | a | 1448.34 | 12.16377  | YES | YES |
| 179 | a | 1449.67 | 8.71518   | YES | YES |
| 180 | a | 1453.24 | 4.50712   | YES | YES |
| 181 | a | 1454.51 | 10.46544  | YES | YES |
| 182 | a | 1457.29 | 8.61029   | YES | YES |
| 183 | a | 1460.86 | 6.90686   | YES | YES |
| 184 | a | 1572.04 | 59.30822  | YES | YES |
| 185 | a | 1592.66 | 26.19098  | YES | YES |
| 186 | a | 1595.47 | 165.40876 | YES | YES |
| 187 | a | 1990.74 | 233.61227 | YES | YES |
| 188 | a | 2275.53 | 24.95914  | YES | YES |
| 189 | a | 2870.06 | 63.84524  | YES | YES |
| 190 | a | 2938.04 | 3.60477   | YES | YES |
| 191 | a | 2939.02 | 25.03640  | YES | YES |
| 192 | a | 2939.55 | 19.68486  | YES | YES |
| 193 | a | 2940.19 | 34.74961  | YES | YES |
| 194 | a | 2942.58 | 14.06721  | YES | YES |
| 195 | a | 2943.51 | 12.68394  | YES | YES |
| 196 | a | 2945.11 | 51.37433  | YES | YES |
| 197 | a | 2946.40 | 30.77303  | YES | YES |

|     |   |         |          |     |     |
|-----|---|---------|----------|-----|-----|
| 198 | a | 2946.91 | 20.71984 | YES | YES |
| 199 | a | 2947.27 | 55.32854 | YES | YES |
| 200 | a | 2947.41 | 41.63470 | YES | YES |
| 201 | a | 2947.95 | 38.81792 | YES | YES |
| 202 | a | 2951.32 | 21.23878 | YES | YES |
| 203 | a | 2953.05 | 34.06214 | YES | YES |
| 204 | a | 2955.37 | 18.36110 | YES | YES |
| 205 | a | 2955.51 | 3.81389  | YES | YES |
| 206 | a | 2964.44 | 4.37344  | YES | YES |
| 207 | a | 2969.13 | 2.85499  | YES | YES |
| 208 | a | 3010.45 | 6.29601  | YES | YES |
| 209 | a | 3013.18 | 16.35969 | YES | YES |
| 210 | a | 3013.29 | 5.90614  | YES | YES |
| 211 | a | 3016.77 | 31.62751 | YES | YES |
| 212 | a | 3016.90 | 16.69253 | YES | YES |
| 213 | a | 3020.09 | 22.69417 | YES | YES |
| 214 | a | 3023.60 | 21.13769 | YES | YES |
| 215 | a | 3026.12 | 9.07831  | YES | YES |
| 216 | a | 3028.63 | 15.67784 | YES | YES |
| 217 | a | 3031.60 | 20.48028 | YES | YES |
| 218 | a | 3032.03 | 4.16458  | YES | YES |
| 219 | a | 3032.45 | 37.27554 | YES | YES |
| 220 | a | 3044.93 | 7.43602  | YES | YES |
| 221 | a | 3045.23 | 14.82641 | YES | YES |
| 222 | a | 3045.89 | 17.98062 | YES | YES |
| 223 | a | 3048.61 | 12.73732 | YES | YES |
| 224 | a | 3053.22 | 11.19038 | YES | YES |
| 225 | a | 3053.57 | 10.70177 | YES | YES |
| 226 | a | 3057.55 | 10.91987 | YES | YES |
| 227 | a | 3059.21 | 11.15829 | YES | YES |
| 228 | a | 3068.74 | 10.25848 | YES | YES |
| 229 | a | 3070.01 | 5.91462  | YES | YES |
| 230 | a | 3076.64 | 5.39462  | YES | YES |
| 231 | a | 3085.82 | 0.51422  | YES | YES |

*trans*-[Ir(Cl)(H)<sub>2</sub>(PiPr<sub>3</sub>)<sub>2</sub>]

```

*****
*
* zero point VIBRATIONAL energy : 0.5704794 Hartree *
* SCF-energy : -1959.1313076 *
* SCF + E(vib0) : -1958.5608282 *
*
*****

```

HEADER

REMARK test basis

|        |   |    |   |        |       |       |
|--------|---|----|---|--------|-------|-------|
| HETATM | 1 | ir | 1 | -0.006 | 0.012 | 0.070 |
| HETATM | 2 | p  | 1 | 2.363  | 0.010 | 0.243 |
| HETATM | 3 | p  | 1 | -2.357 | 0.057 | 0.054 |
| HETATM | 4 | c  | 1 | 2.929  | 1.725 | 0.859 |

|        |    |    |   |        |        |        |
|--------|----|----|---|--------|--------|--------|
| HETATM | 5  | c  | 1 | 3.451  | -0.419 | -1.245 |
| HETATM | 6  | c  | 1 | 2.987  | -1.154 | 1.629  |
| HETATM | 7  | c  | 1 | 2.296  | 2.876  | 0.052  |
| HETATM | 8  | c  | 1 | 4.441  | 1.951  | 1.033  |
| HETATM | 9  | c  | 1 | 3.309  | 0.593  | -2.396 |
| HETATM | 10 | c  | 1 | 3.155  | -1.846 | -1.749 |
| HETATM | 11 | c  | 1 | 4.480  | -1.537 | 1.586  |
| HETATM | 12 | c  | 1 | 2.127  | -2.425 | 1.765  |
| HETATM | 13 | c  | 1 | -3.072 | 1.322  | -1.185 |
| HETATM | 14 | c  | 1 | -3.227 | 0.429  | 1.691  |
| HETATM | 15 | c  | 1 | -3.032 | -1.596 | -0.589 |
| HETATM | 16 | c  | 1 | -2.120 | 2.514  | -1.396 |
| HETATM | 17 | c  | 1 | -4.507 | 1.809  | -0.910 |
| HETATM | 18 | c  | 1 | -2.772 | 1.784  | 2.265  |
| HETATM | 19 | c  | 1 | -4.558 | -1.781 | -0.564 |
| HETATM | 20 | c  | 1 | -3.036 | -0.685 | 2.735  |
| HETATM | 21 | c  | 1 | -2.300 | -2.801 | 0.033  |
| HETATM | 22 | cl | 1 | -0.136 | -0.583 | -2.313 |
| HETATM | 23 | h  | 1 | 0.001  | 1.265  | 1.032  |
| HETATM | 24 | h  | 1 | -0.035 | -0.440 | 1.593  |
| HETATM | 25 | h  | 1 | 2.456  | 1.737  | 1.869  |
| HETATM | 26 | h  | 1 | 4.498  | -0.383 | -0.866 |
| HETATM | 27 | h  | 1 | 2.810  | -0.533 | 2.538  |
| HETATM | 28 | h  | 1 | 2.378  | 3.826  | 0.630  |
| HETATM | 29 | h  | 1 | 1.221  | 2.688  | -0.159 |
| HETATM | 30 | h  | 1 | 2.811  | 3.035  | -0.919 |
| HETATM | 31 | h  | 1 | 4.624  | 2.997  | 1.371  |
| HETATM | 32 | h  | 1 | 4.997  | 1.817  | 0.080  |
| HETATM | 33 | h  | 1 | 4.893  | 1.283  | 1.795  |
| HETATM | 34 | h  | 1 | 3.918  | 0.248  | -3.264 |
| HETATM | 35 | h  | 1 | 3.673  | 1.606  | -2.123 |
| HETATM | 36 | h  | 1 | 2.252  | 0.666  | -2.730 |
| HETATM | 37 | h  | 1 | 3.849  | -2.092 | -2.586 |
| HETATM | 38 | h  | 1 | 2.113  | -1.913 | -2.130 |
| HETATM | 39 | h  | 1 | 3.296  | -2.620 | -0.966 |
| HETATM | 40 | h  | 1 | 4.750  | -2.076 | 2.523  |
| HETATM | 41 | h  | 1 | 5.161  | -0.666 | 1.499  |
| HETATM | 42 | h  | 1 | 4.701  | -2.226 | 0.742  |
| HETATM | 43 | h  | 1 | 2.423  | -2.984 | 2.683  |
| HETATM | 44 | h  | 1 | 2.265  | -3.110 | 0.900  |
| HETATM | 45 | h  | 1 | 1.045  | -2.186 | 1.831  |
| HETATM | 46 | h  | 1 | -3.068 | 0.731  | -2.129 |
| HETATM | 47 | h  | 1 | -4.311 | 0.496  | 1.445  |
| HETATM | 48 | h  | 1 | -2.688 | -1.534 | -1.648 |
| HETATM | 49 | h  | 1 | -2.515 | 3.171  | -2.206 |
| HETATM | 50 | h  | 1 | -1.109 | 2.166  | -1.692 |
| HETATM | 51 | h  | 1 | -2.017 | 3.136  | -0.480 |
| HETATM | 52 | h  | 1 | -4.864 | 2.415  | -1.774 |
| HETATM | 53 | h  | 1 | -4.556 | 2.467  | -0.014 |
| HETATM | 54 | h  | 1 | -5.235 | 0.984  | -0.764 |
| HETATM | 55 | h  | 1 | -3.359 | 2.021  | 3.182  |

|        |    |   |   |        |        |        |
|--------|----|---|---|--------|--------|--------|
| HETATM | 56 | h | 1 | -2.912 | 2.624  | 1.552  |
| HETATM | 57 | h | 1 | -1.697 | 1.755  | 2.545  |
| HETATM | 58 | h | 1 | -4.819 | -2.776 | -0.993 |
| HETATM | 59 | h | 1 | -5.092 | -1.018 | -1.168 |
| HETATM | 60 | h | 1 | -4.971 | -1.754 | 0.469  |
| HETATM | 61 | h | 1 | -3.485 | -0.371 | 3.705  |
| HETATM | 62 | h | 1 | -1.958 | -0.893 | 2.913  |
| HETATM | 63 | h | 1 | -3.525 | -1.636 | 2.437  |
| HETATM | 64 | h | 1 | -2.529 | -3.717 | -0.557 |
| HETATM | 65 | h | 1 | -2.609 | -2.993 | 1.082  |
| HETATM | 66 | h | 1 | -1.199 | -2.649 | 0.020  |

END
